# Supplementary material
Source: Springer Nature journal article supplement (https://www.springermedizin.de/resource/supplementary/13053_2009_143_MOESM5_ESM.pdf/9674286)

# Box Plot of multiple variables grouped by 10:1. dr risk

Sheet1 in nyaste version\_090509.stw 28v\*215c

Mean; Box: Mean $\pm$ SE; Whisker: Mean $\pm$ 0.95 Conf. Interval

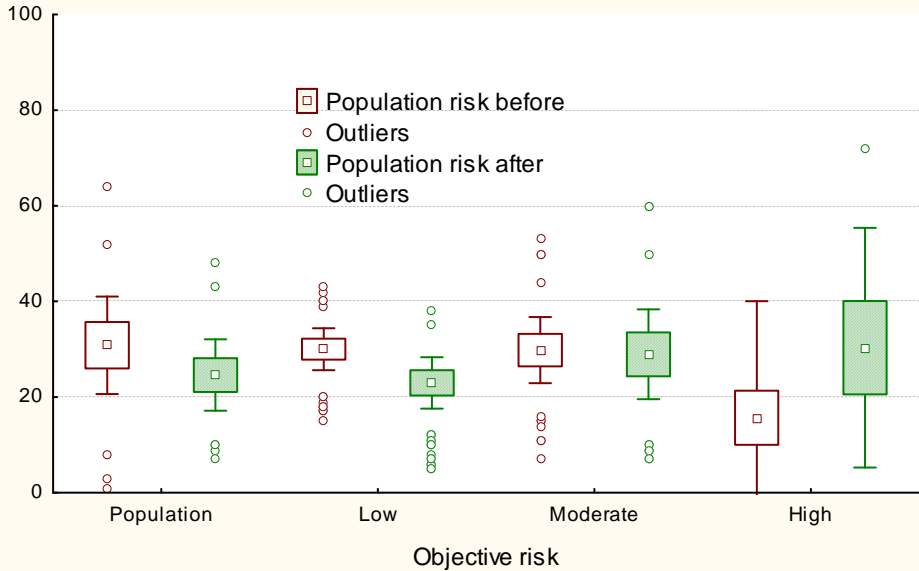

Supplement: MOESM5 [file 9674286]
